# Supplementary material
Source: PubMed Central journal article supplement (PMC5102811)

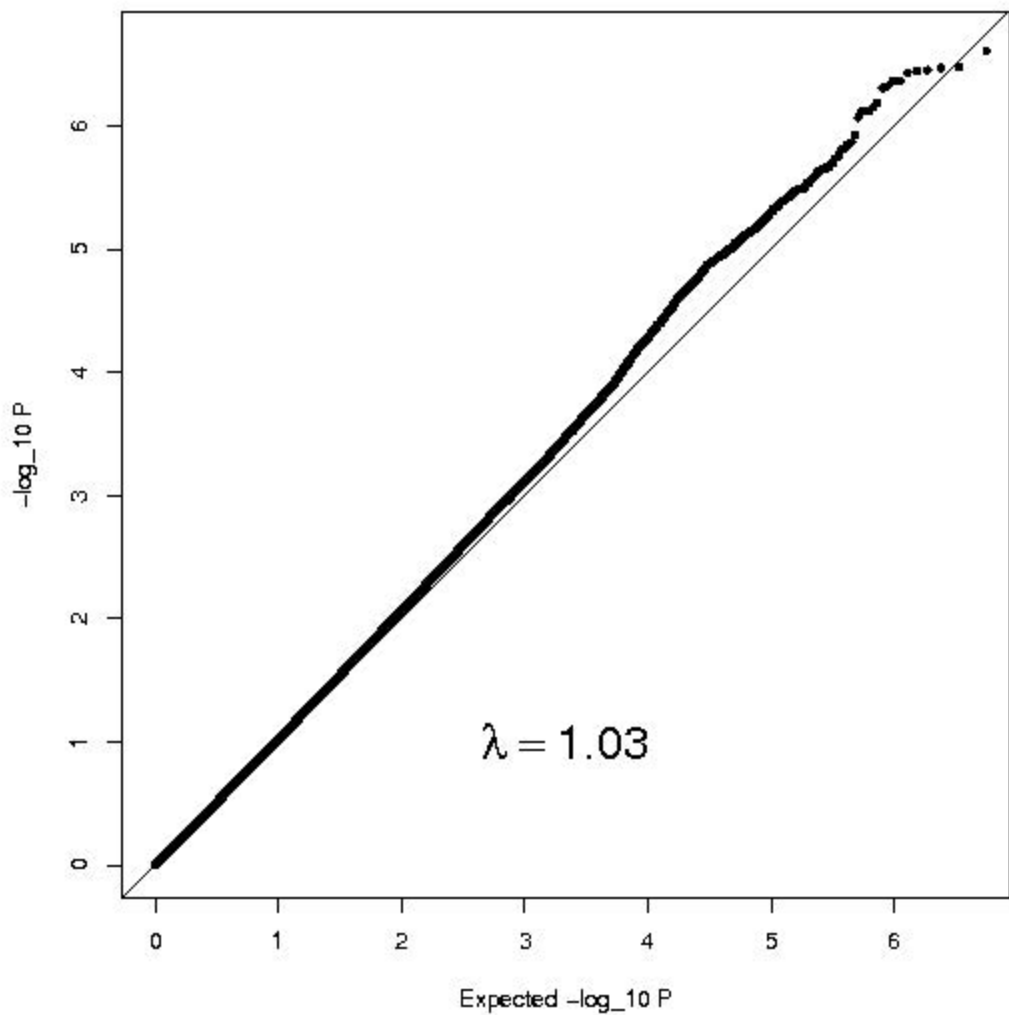

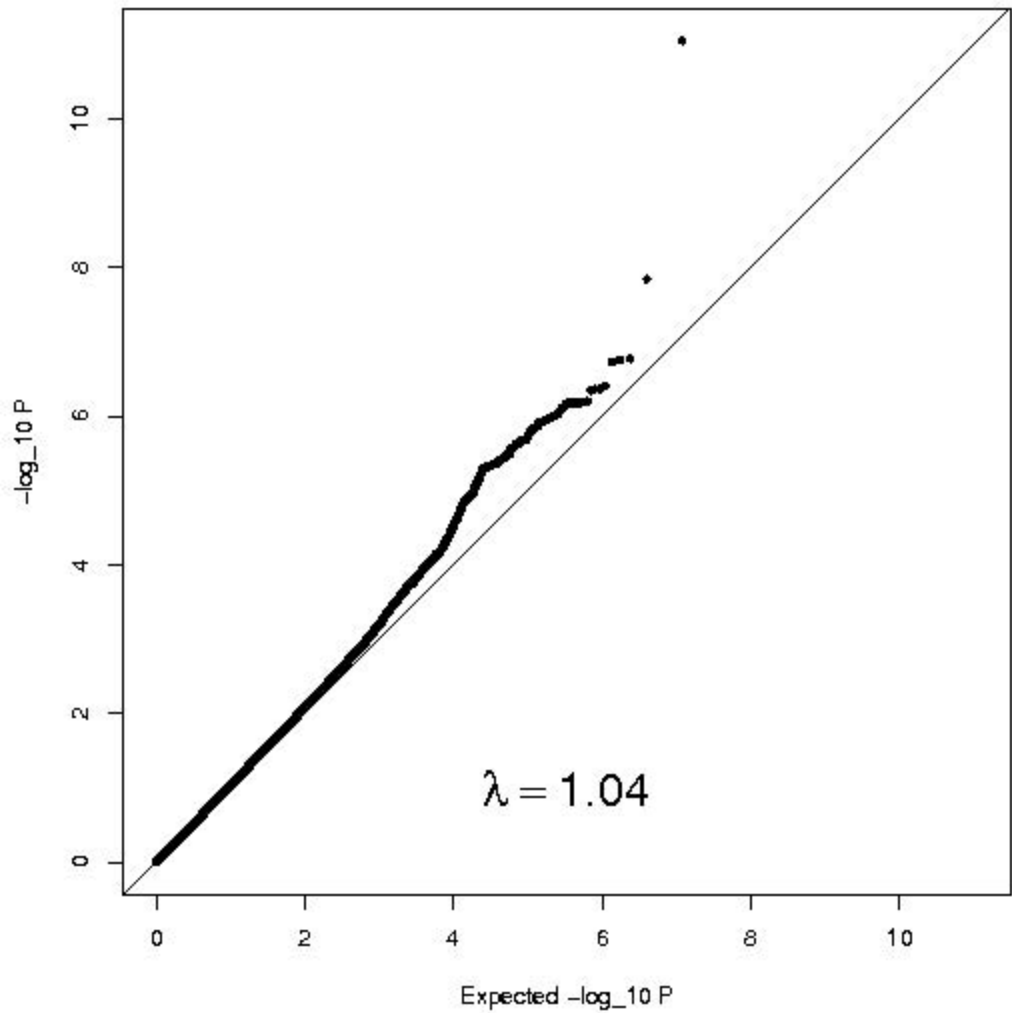

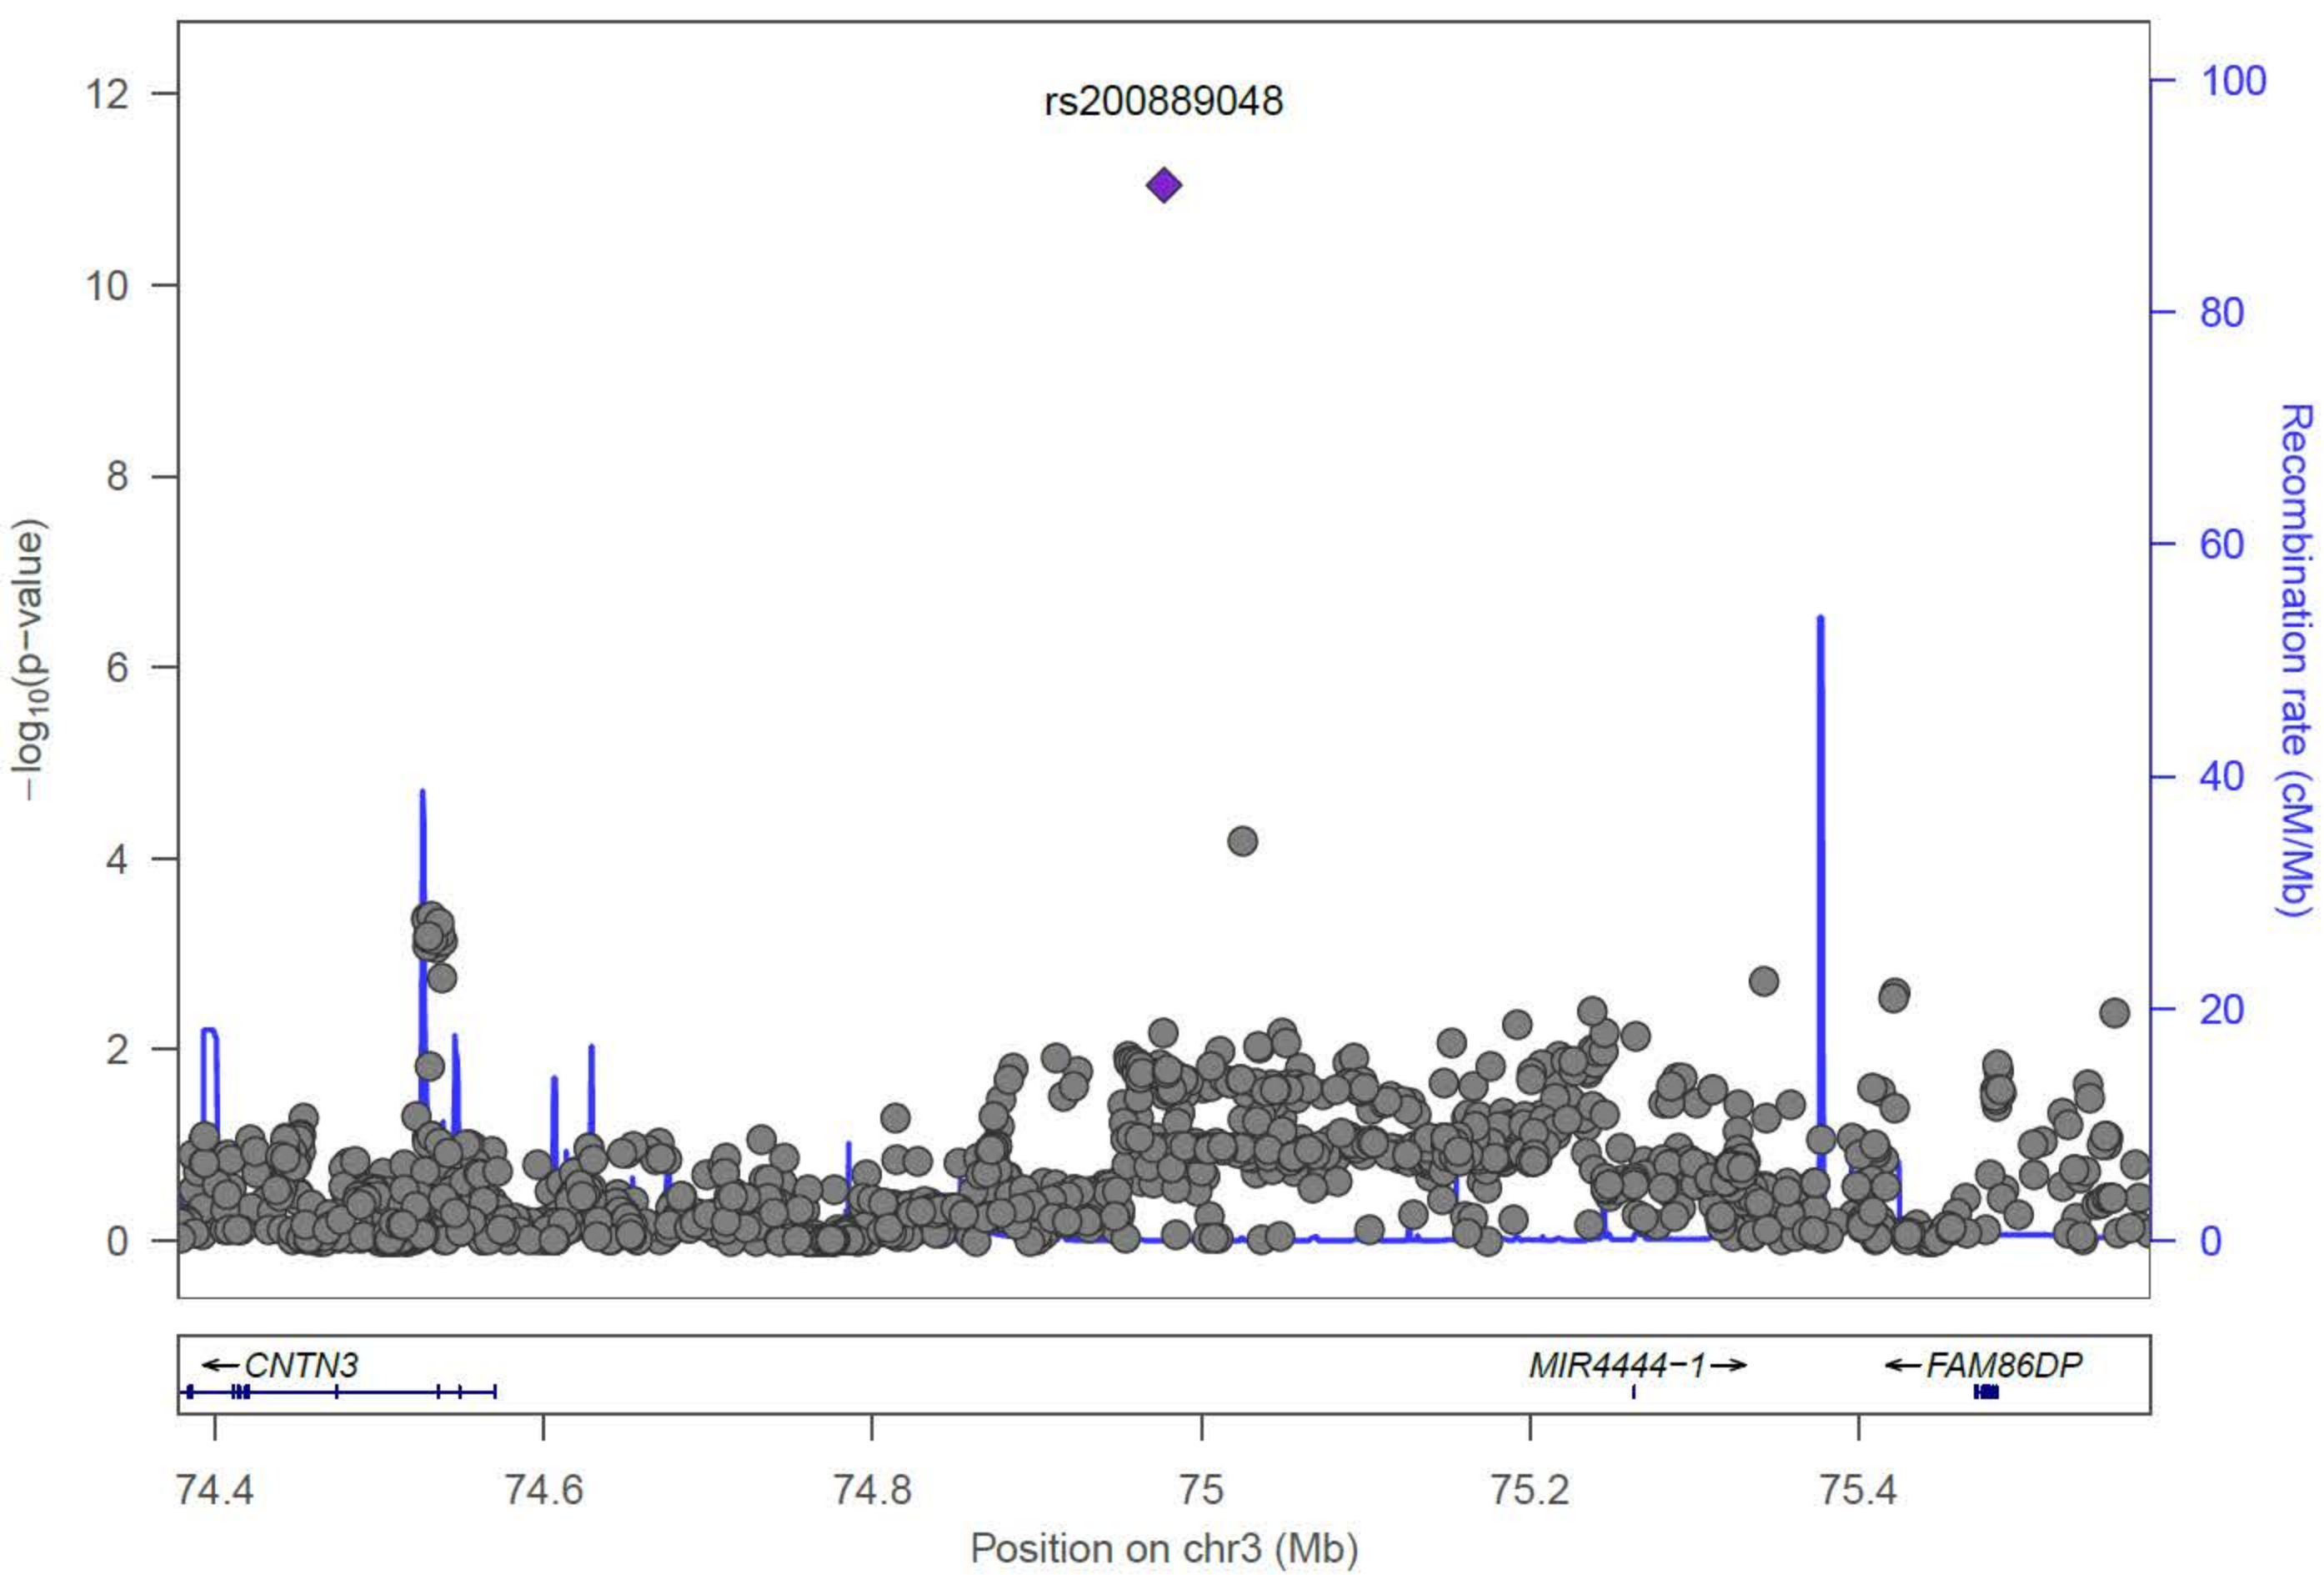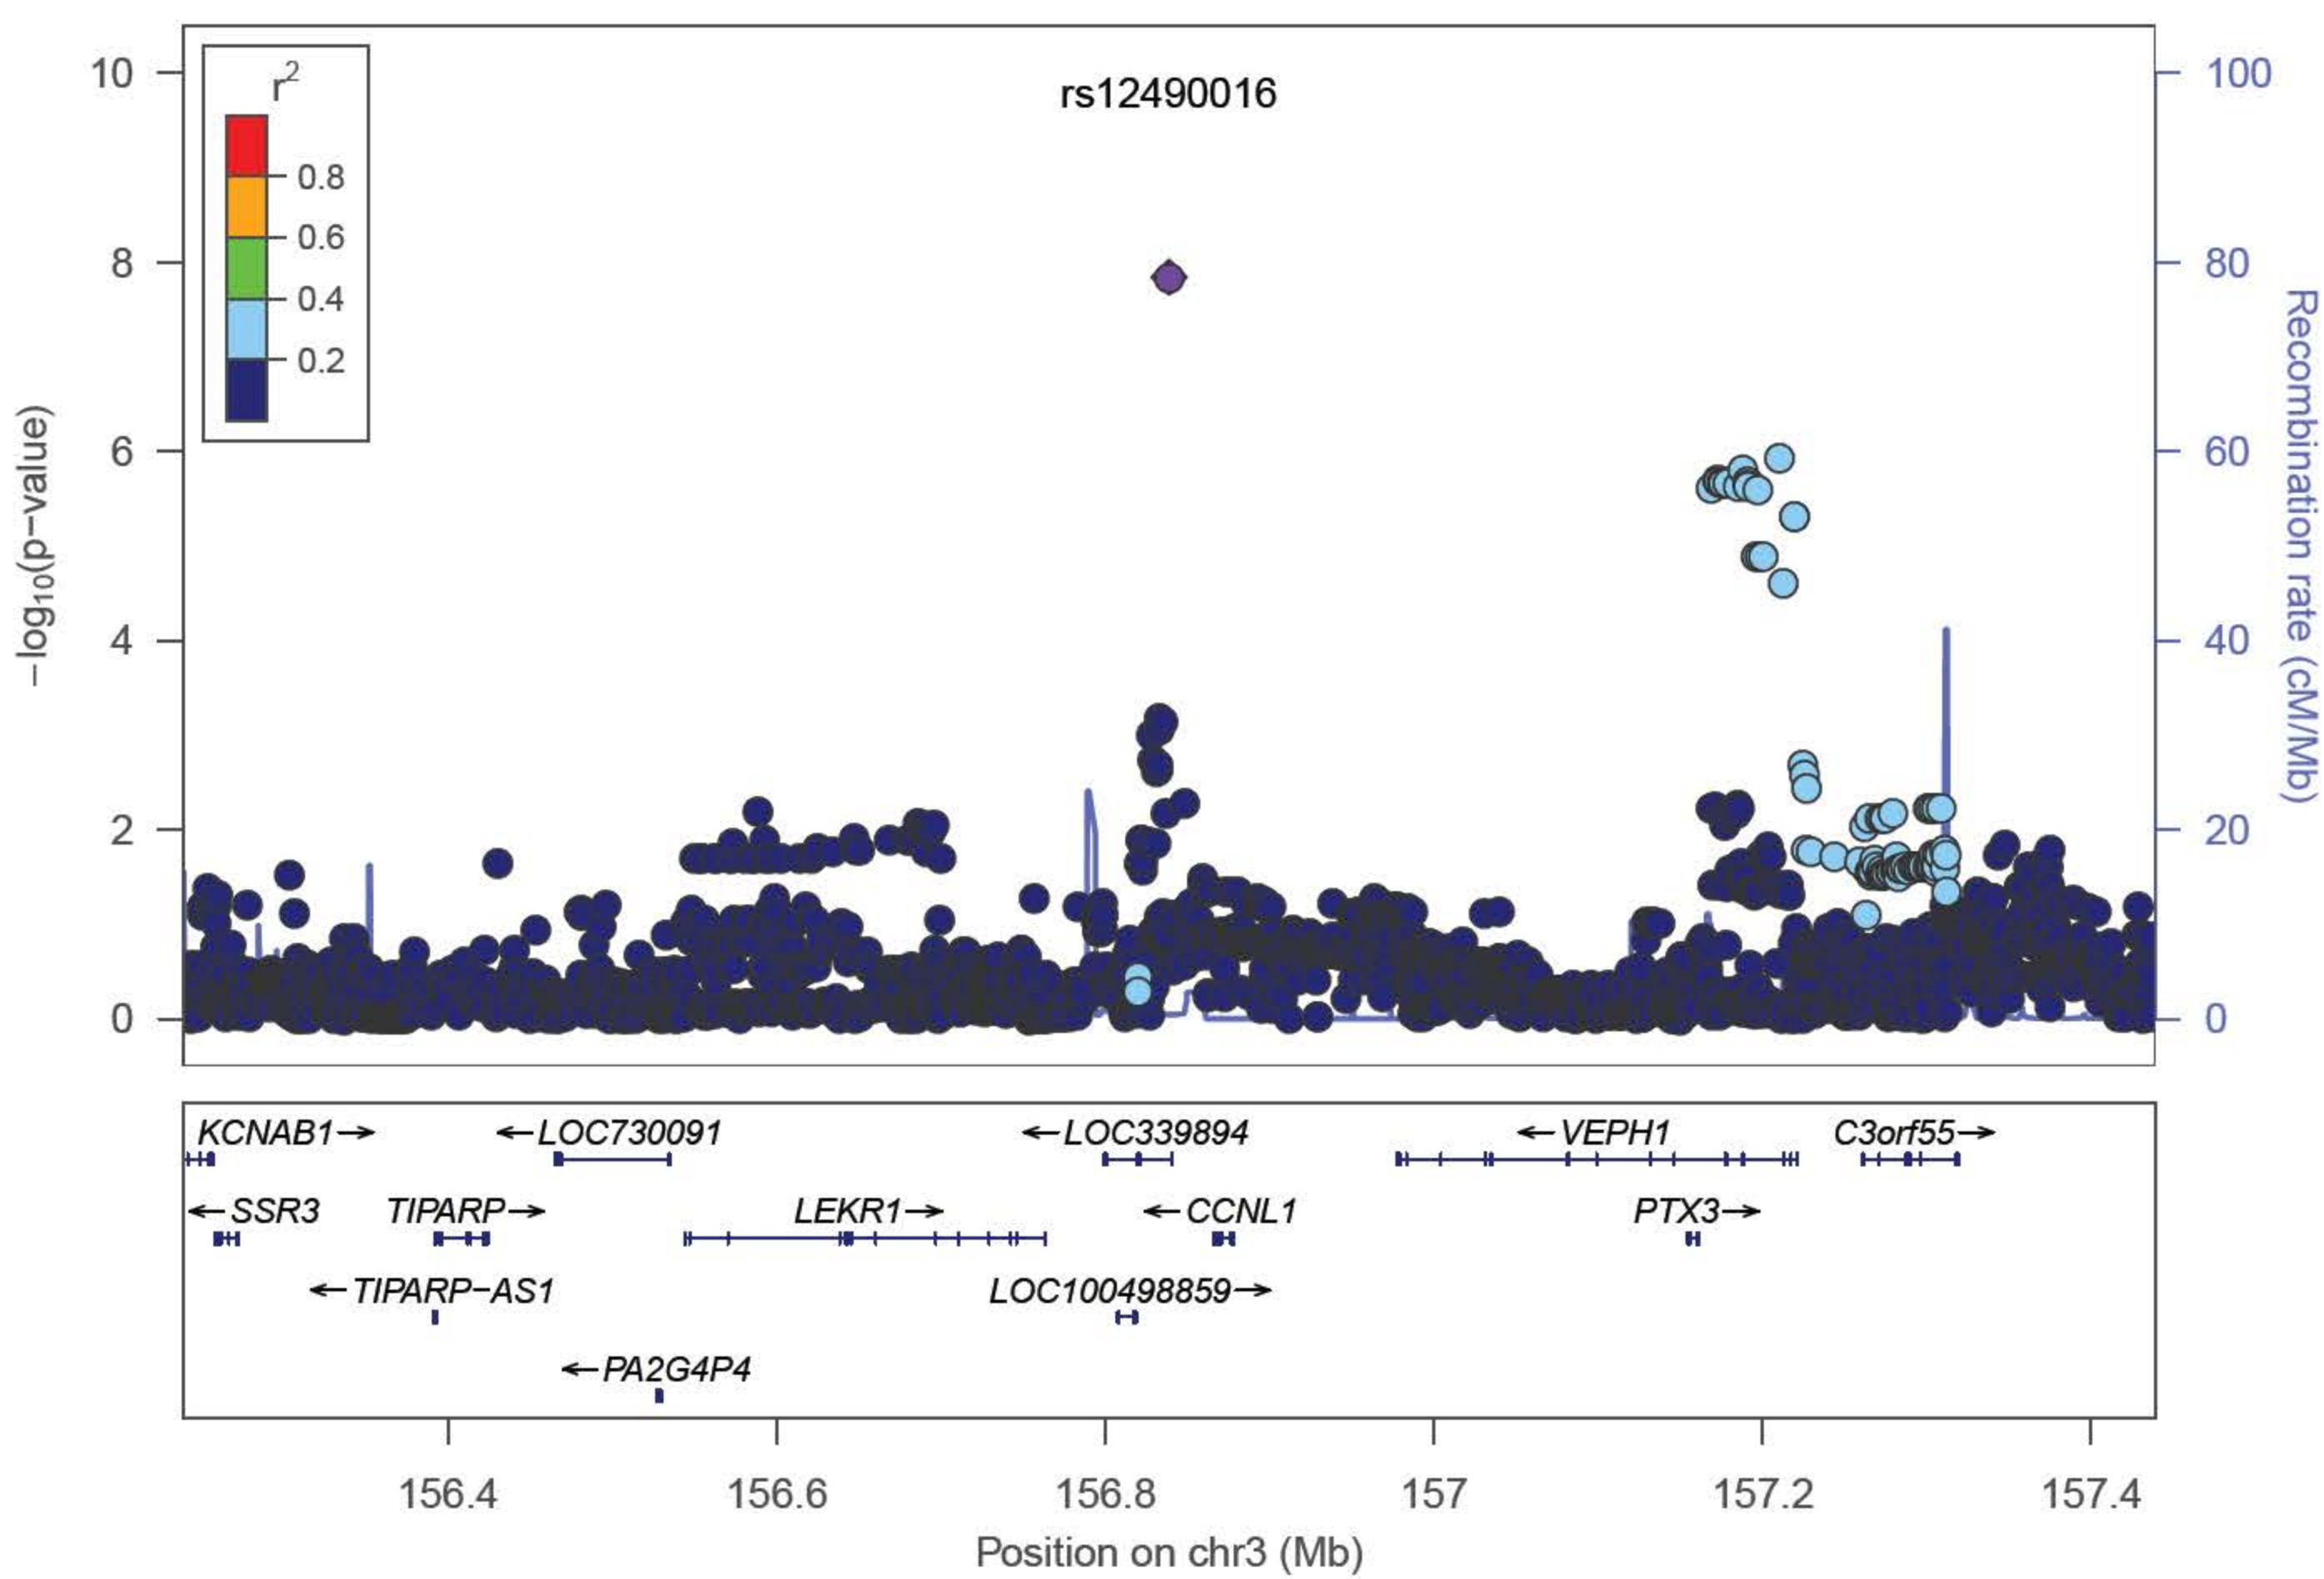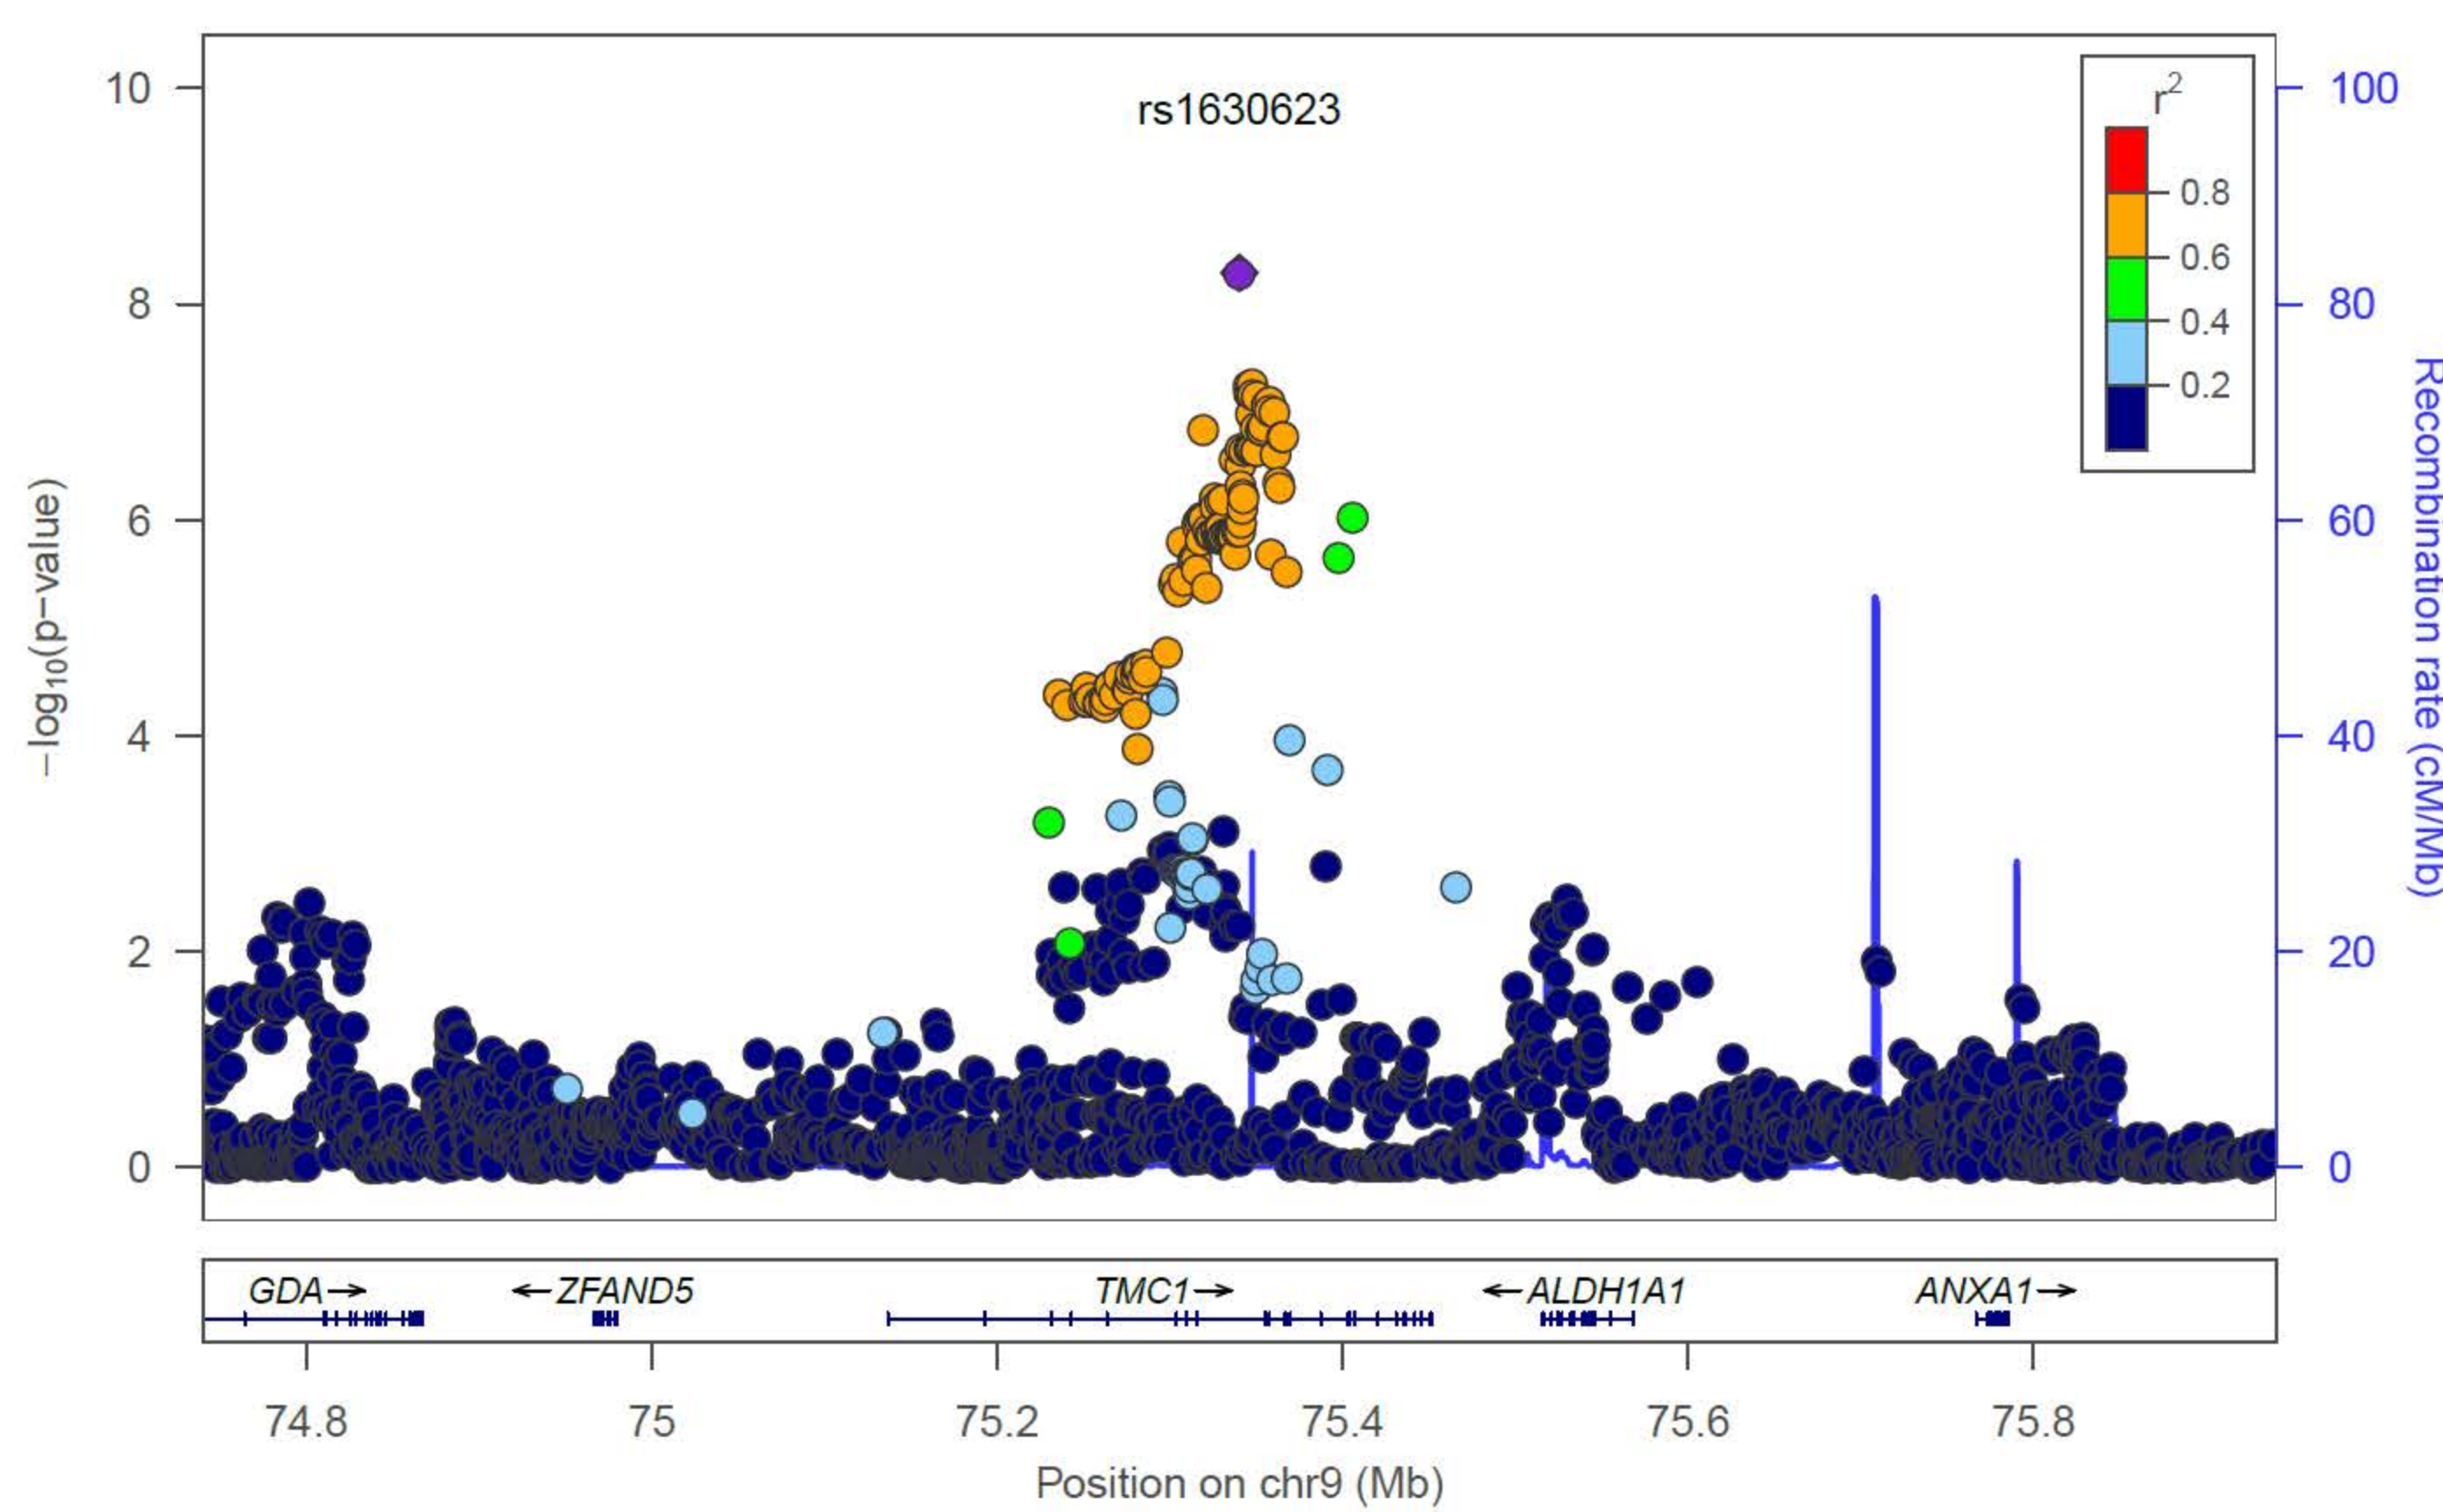

Supplement: NIHMS731130-supplement-Supp_FigureS1-S3.pdf [file NIHMS731130-supplement-Supp_FigureS1-S3.pdf]
